# Supplementary material for: Extensive regulation of nicotinate phosphoribosyltransferase (NAPRT) expression in human tissues and tumors
Source: PubMed Central journal article supplement (PMC4811510; doi:10.18632/oncotarget.6538), 2015-12-09
Supplement: oncotarget-07-1973-s001.pdf [file oncotarget-07-1973-s001.pdf]

# Extensive regulation of nicotinate phosphoribosyltransferase (NAPRT) expression in human tissues and tumors

## Supplementary Material

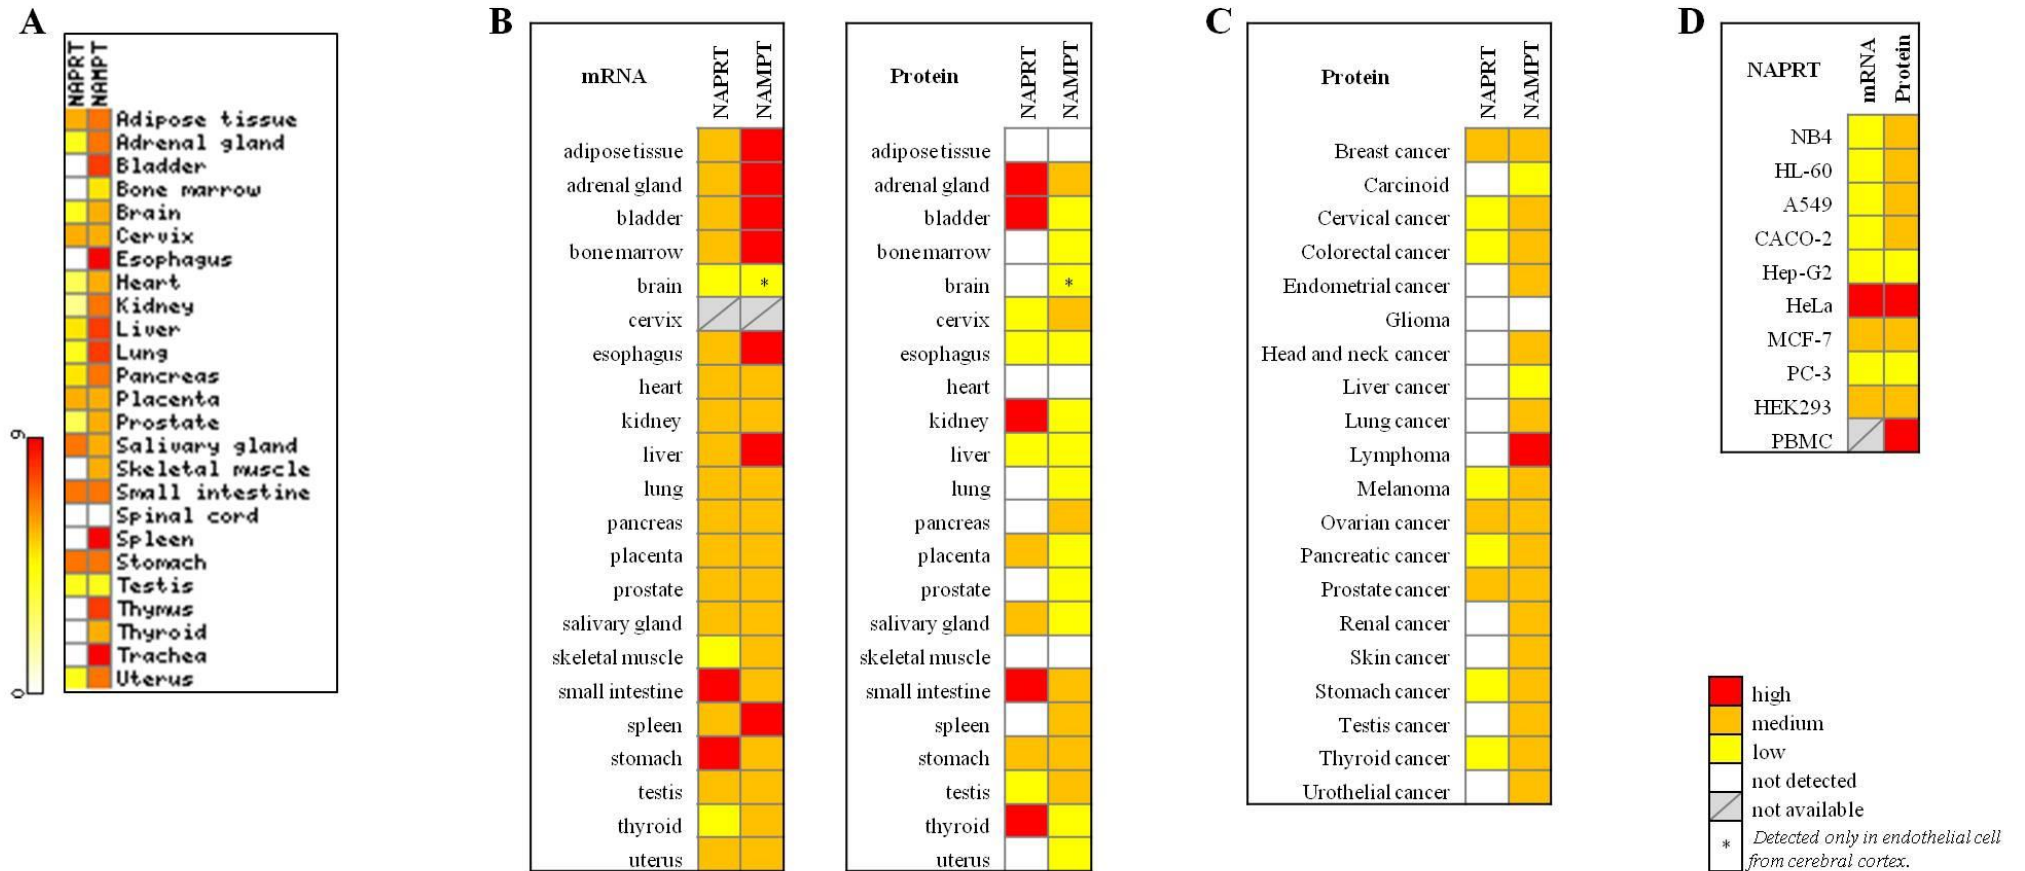

**Supplementary Figure 1: Expression profiles of human NAPRT and NAMPT from UniGene (A) and Human Protein Atlas (B, C, and D) databases.** A. EST profiles of human *NAPRT* and *NAMPT* retrieved from UniGene are represented as log<sub>2</sub> of EST counts by color coding. B. Expression profiles of normal tissues, both at the mRNA and protein level. C. Protein expression from cancer tissues. D. NAPRT mRNA and protein expression in selected cell lines. The mRNA expression data is derived from deep sequencing of RNA and the protein expression data is derived from antibody-based protein profiling using immunohistochemistry. Presented data refers to information available online on 1<sup>st</sup> June 2015 at [www.proteinatlas.org](http://www.proteinatlas.org) and was categorized in high, medium, low or not detected level of expression according to database annotations.

**A**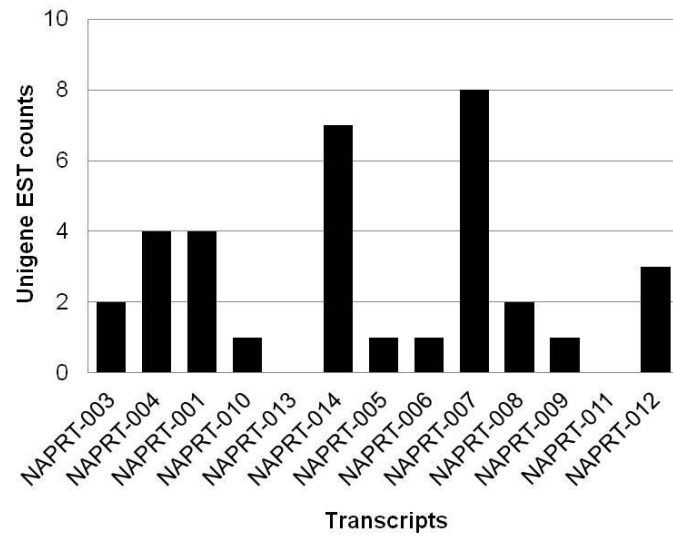**B**

| Transcripts (Ensembl)                   |                                 | Tissues                            |
|-----------------------------------------|---------------------------------|------------------------------------|
| <b>protein coding</b>                   | NAPRT-003                       | testis, uncharacterized            |
|                                         | NAPRT-004                       | brain, testis, intestine, pancreas |
| <b>nonsense/non-stop mediated decay</b> | NAPRT-001                       | intestine, liver, uncharacterized  |
|                                         | NAPRT-010                       | connective tissue                  |
|                                         | NAPRT-013                       | -                                  |
|                                         | NAPRT-014                       | testis                             |
| <b>retained intron</b>                  | NAPRT-005                       | uncharacterized                    |
|                                         | NAPRT-006                       | testis                             |
|                                         | NAPRT-007                       | placenta, ovary, testis, intestine |
|                                         | NAPRT-008                       | brain, pancreas                    |
|                                         | NAPRT-009                       | testis                             |
|                                         | NAPRT-011                       | -                                  |
|                                         | NAPRT-012                       | liver, uncharacterized             |
|                                         | <b>Total alternative ESTs :</b> |                                    |
| <b>Total ESTs analyzed:</b>             |                                 | 196                                |

**Supplementary Figure 2: Alternative *NAPRT* transcripts predicted in Ensembl Genome Browser and detected in UniGene databases. A.** Number of counts of *NAPRT* alternative transcripts represented in the EST database UniGene. **B.** Tissues in which the different transcripts were found, excluding the reference sequence.

**A**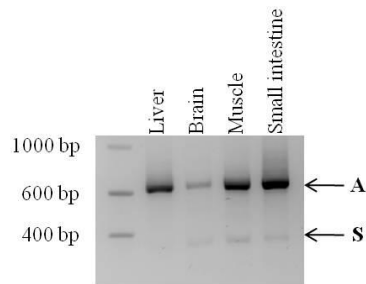**B**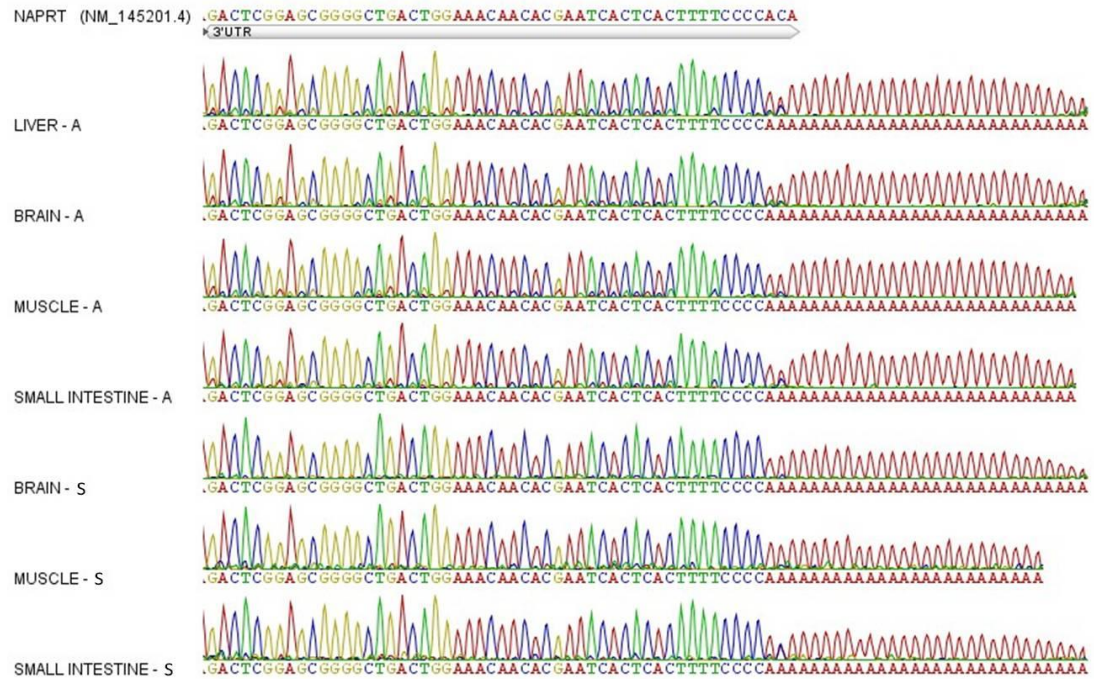

**Supplementary Figure 3: *NAPRT* transcripts characterization by 3'-RACE.** **A.** RACE analysis of *NAPRT* mRNA 3' ends revealed the presence of two transcripts in the same tissue, the reference sequence (A) and the smaller fragment (S). **B.** Sequencing of the two different transcripts in brain, muscle and small intestine showed that the 3' end is similar in the two transcripts and no conventional polyadenylation signal was detectable. The smaller fragment (S) lacks exons 11 and 12, originating the difference in size between the two transcripts.

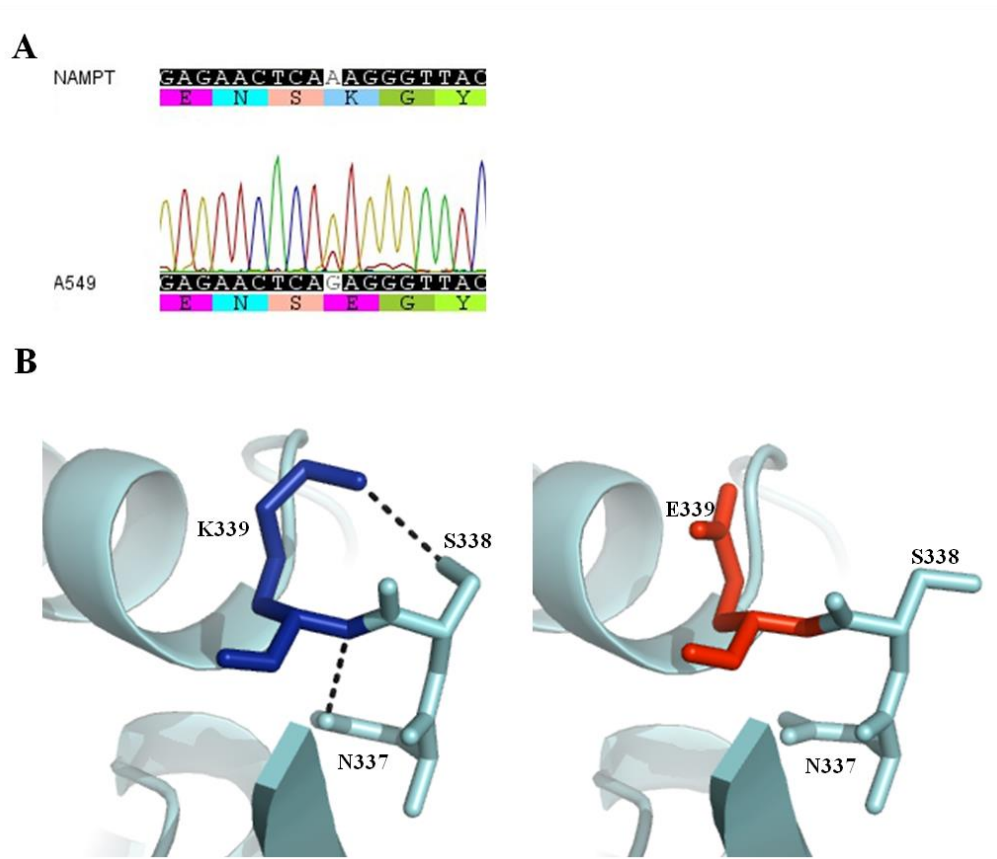

**Supplementary Figure 4: NAMPT missense mutation Lys339Glu.** **A.** Electropherogram showing g.23531A>G replacement in heterozygosity that leads to Lys339Glu substitution in NAMPT protein. **B.** Structural model representing Lys339 (blue), which establishes polar contacts with Asn337 and Ser338. In the model with Glu339 (red) those polar contacts are lost.

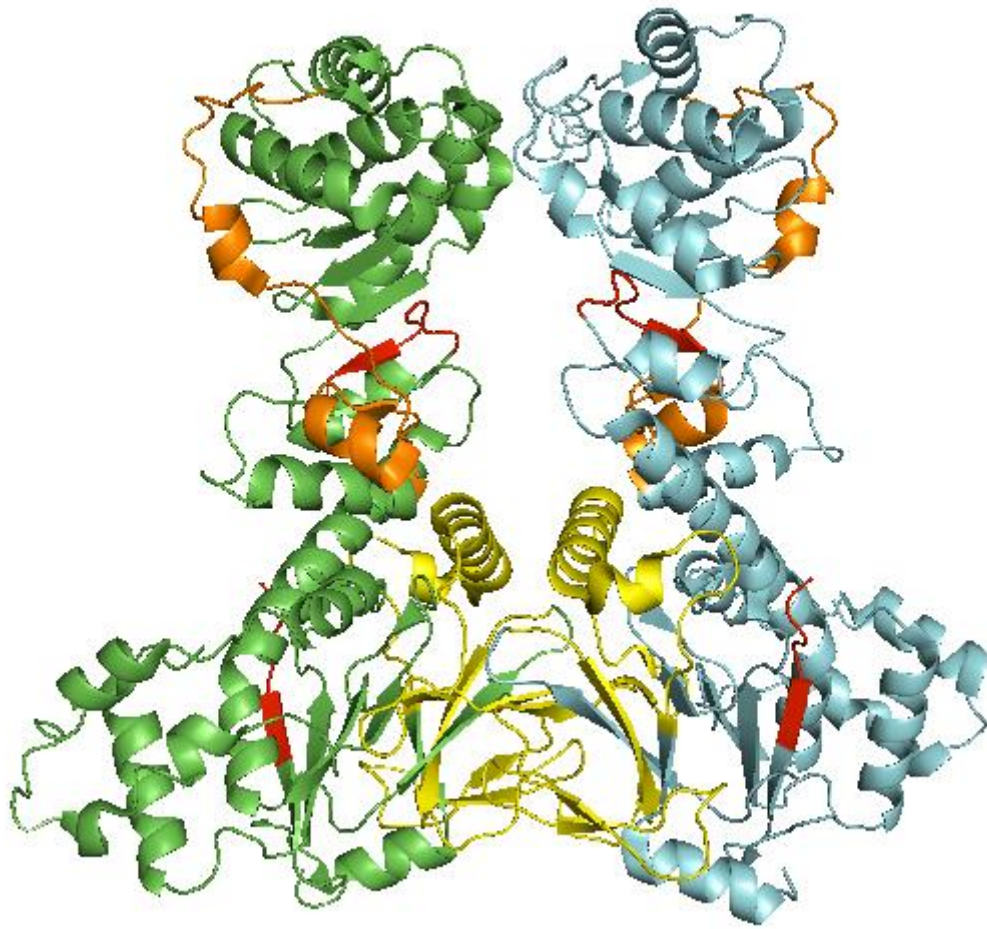

**Supplementary Figure 5:** Crystal structure of human Nicotinic Acid Phosphoribosyltransferase (PDB ID: 4YUB) [27]. Exons 5 (orange) and 9 (red) are partly located in the active center and exons 11 and 12 (yellow) are located in the dimer interface. The alternative transcripts missing these exons will most probably result in enzyme inactivation.

**Supplementary Table 1. Allele frequencies of human *NAPRT* promoter genetic variants.** Seven alterations were detected in *NAPRT* putative promoter region. Predicted Impact of each mutation was retrieved from RegulomeDB (<http://regulomedb.org/>).

| Ref ID      | Variant type | Nucleotide change | 786 | C643 | HUVEC | NB4 | HL60 | A549 | HEK293 | AGS | CAKI2 | HCT116 | HT29 | MKN28 | ML2 | RegulomeDB                    |
|-------------|--------------|-------------------|-----|------|-------|-----|------|------|--------|-----|-------|--------|------|-------|-----|-------------------------------|
| rs6996126   | 5' near gene | c.-340G>T         |     |      |       |     |      |      |        |     |       |        |      |       |     | 4 - minimal binding evidence  |
| -           | 5' near gene | c.-256C>A         |     |      |       |     |      |      |        |     |       |        |      |       |     | -                             |
| rs3214817   | 5' near gene | c.-209_208insG    |     |      |       |     |      |      |        |     |       |        |      |       |     | 2b - likely to affect binding |
| rs896949    | 5' near gene | c.-87G>C          |     |      |       |     |      |      |        |     |       |        |      |       |     | 4 - minimal binding evidence  |
| rs4475500   | 5' near gene | c.-35T>C          |     |      |       |     |      |      |        |     |       |        |      |       |     | 2b - likely to affect binding |
| rs146163552 | 5'UTR        | c.-26_25insTCGGG  |     |      |       |     |      |      |        |     |       |        |      |       |     | 2b - likely to affect binding |
| rs2305495   | 5'UTR        | c.-25G>C          |     |      |       |     |      |      |        |     |       |        |      |       |     | 2b - likely to affect binding |

|                                                                                  |                              |
|----------------------------------------------------------------------------------|------------------------------|
|  | homozygous for the variant   |
|  | heterozygous for the variant |
|  | wild-type                    |

**Supplementary Table 2. Allele frequencies of human *NAMPT* and *NAPRT* genetic variants.** Partial sequencing of the genes revealed two intronic and one silent variants in *NAMPT*. Also, one missense mutation was identified in A549 cell line. In *NAPRT*, five intronic and two silent variants were found. Predicted Impact of each mutation was retrieved from RegulomeDB (<http://regulomedb.org/>).

| Gene         | Ref ID     | Variant type | Exon / Intron | Nucleotide change | Amino acid change | 786 | C643 | MEL202 | DLD1 | HUVEC | HELA | NB4 | HL60 | HCT15 | A549 | HEK293 | CAKI2 | MKN28 | ML2 | RegulomeDB                                                              |
|--------------|------------|--------------|---------------|-------------------|-------------------|-----|------|--------|------|-------|------|-----|------|-------|------|--------|-------|-------|-----|-------------------------------------------------------------------------|
|              |            |              |               |                   |                   |     |      |        |      |       |      |     |      |       |      |        |       |       |     |                                                                         |
| <i>NAMPT</i> | rs28454100 | Intronic     | intron 4      | g.13195T>G        | -                 |     |      |        |      |       |      |     |      |       |      |        |       |       |     | 6 - minimal binding evidence                                            |
|              | rs34056375 | Intronic     | intron 4      | g.13422G>A        | -                 |     |      |        |      |       |      |     |      |       |      |        |       |       |     | 6 - minimal binding evidence                                            |
|              | rs2302559  | Silent       | exon 7        | g.21735A>G        | Ser301Ser         |     |      |        |      |       |      |     |      |       |      |        |       |       |     | 5 - minimal binding evidence                                            |
|              | -          | Missense     | exon 8        | g.23531A>G        | Lys339Glu         |     |      |        |      |       |      |     |      |       |      |        |       |       |     | -                                                                       |
| <i>NAPRT</i> | rs2015562  | Intronic     | intron 1      | g.257C>A          | -                 |     |      |        |      |       |      |     |      |       |      |        |       |       |     | 4 - minimal binding evidence                                            |
|              | rs896953   | Intronic     | intron 1      | g.325T>C          | -                 |     |      |        |      |       |      |     |      |       |      |        |       |       |     | 3a - less likely to affect binding                                      |
|              | rs896954   | Silent       | exon 2        | g.468C>T          | Ala98Ala          |     |      |        |      |       |      |     |      |       |      |        |       |       |     | 4 - minimal binding evidence                                            |
|              | rs2305496  | Intronic     | intron 2      | g.565G>T          | -                 |     |      |        |      |       |      |     |      |       |      |        |       |       |     | 1f - likely to affect binding and linked to expression of a gene target |
|              | rs12678314 | Intronic     | intron 3      | g.906T>C          | -                 |     |      |        |      |       |      |     |      |       |      |        |       |       |     | 5 - minimal binding evidence                                            |
|              | -          | Intronic     | intron 5      | g.1303delC        | -                 |     |      |        |      |       |      |     |      |       |      |        |       |       |     | -                                                                       |
| rs872935     | Silent     | exon 7       | g.1803C>T     | Leu305Leu         |                   |     |      |        |      |       |      |     |      |       |      |        |       |       |     | 5 - minimal binding evidence                                            |

|                                                                                  |                              |
|----------------------------------------------------------------------------------|------------------------------|
|  | homozygous for the variant   |
|  | heterozygous for the variant |
|  | wild-type                    |

**Supplementary Table 3. Functionality prediction of the protein isoforms derived from novel *NAPRT* alternative transcripts.**

| Tissue                                                     | Sequence                                                                                                | Alternative splicing events | Consequence                                                                       | Known role of lost residues                                | Predicted effect on function                              |
|------------------------------------------------------------|---------------------------------------------------------------------------------------------------------|-----------------------------|-----------------------------------------------------------------------------------|------------------------------------------------------------|-----------------------------------------------------------|
| Brain                                                      | <b>B</b>                                                                                                | deletion of exon 9          | loses T380, S381, K396                                                            | ATP and PRPP binding [27]                                  | decreased/ lost activity                                  |
|                                                            |                                                                                                         | deletion of exon 9          | loses T380, S381, K396                                                            | ATP and PRPP binding [27]                                  | decreased/ lost activity                                  |
|                                                            | <b>C</b>                                                                                                | partial deletion of exon 11 | deletion of 13 aa                                                                 | (alteration in the protein coding<br>NAPRT-003 transcript) |                                                           |
|                                                            |                                                                                                         | <b>D</b>                    | partial deletion of exon 6<br>deletion of exon 9                                  | deletion of 56 aa<br>loses T380, S381, K396                | ATP and PRPP binding [27]                                 |
|                                                            | <b>E</b>                                                                                                | partial deletion of exon 5  | loses S195, N196, T210, A212, F215,<br>H213, S214                                 | NA binding, ATP activation, PRPP<br>stabilization [24,27]  | decreased/ lost activity                                  |
| retained intron 5                                          |                                                                                                         | insertion of 73 aa          |                                                                                   |                                                            |                                                           |
| Intestine                                                  | <b>F</b>                                                                                                | deletion of exon 9          | loses T380, S381, K396                                                            | ATP and PRPP binding [27]                                  | decreased/ lost activity                                  |
|                                                            |                                                                                                         | deletion of exons 11 and 12 | deletion of 88 aa (from 431 to 518)<br>altered reading frame, STOP<br>readthrough |                                                            | loses interface for dimerization                          |
| HCT-15                                                     | <b>G</b>                                                                                                | partial deletion of exon 12 | premature stop condon                                                             |                                                            |                                                           |
|                                                            | <b>H</b>                                                                                                | deletion of exon 5          | loses S195, N196, T210, A212, F215,<br>H213, S214                                 | NA binding, ATP activation, PRPP<br>stabilization [24,27]  | decreased/ lost activity                                  |
|                                                            |                                                                                                         | partially retained intron 5 | insertion of 23 aa                                                                |                                                            |                                                           |
|                                                            | <b>I</b>                                                                                                | deletion of exons 11 and 12 | deletion of 88 aa (from 431 to 518)<br>altered reading frame, STOP<br>readthrough | location of the dimer interface [27]                       | loses interface for dimerization                          |
|                                                            |                                                                                                         | <b>J</b>                    | deletion of exon 5                                                                | loses S195, N196, T210, A212, F215,<br>H213, S214          | NA binding, ATP activation, PRPP<br>stabilization [24,27] |
| partially retained intron 5<br>deletion of exons 11 and 12 | insertion of 23 aa<br>deletion of 88 aa (from 431 to 518)<br>altered reading frame, STOP<br>readthrough |                             |                                                                                   | loses interface for dimerization                           |                                                           |



**Supplementary Table 4. Oligonucleotide sequences used for amplification of *NAMPT* and *NAPRT* genes.**

| Gene         | Sample type  | Location                  | Primer forward (5'-3')         | Primer reverse (5'-3')        | Annealing temperature (°C) | Product size (bp) |
|--------------|--------------|---------------------------|--------------------------------|-------------------------------|----------------------------|-------------------|
| <i>NAMPT</i> | DNA          | Exon 2                    | CTTCAAGCCTTTTCTGTTGTG          | CTTAGAACATCAAACACACACC        | 60                         | 424               |
|              |              | Exon 4                    | AGCACGTGGCAGCATTAAC            | GATGAGGAAATTGAAGCCTGG         | 58                         | 502               |
|              |              | Exon 7                    | CATAACAGCTTGGGGGAAAG           | CTCTCTCTGGGCTGCAACT           | 58                         | 362               |
|              |              | Exon 8                    | CCCTTTAAAGTACACTGGACC          | GTAAGTATGGCTTGGCTGGC          | 60                         | 491               |
|              |              | Exon 9                    | CAGTCTTGGATGCTTCATTC           | CTCCCTTCTTTCCTTGTTTCTG        | 58                         | 402               |
|              | RT-PCR       | Exon 1-4                  | CTCATTTTTCTCCTTCCTCGC          | TCCTCTGGGAATGACAAAGC          | 60                         | 454               |
|              |              | Exon 3-7                  | TCCAGGAAGCCAAAGATGTC           | CTTTCCCCAAGCTGTTATG           | 60                         | 527               |
|              |              | Exon 6-8                  | GCATCTGCTCACTTGGTTAAC          | CTCTAAGATAAGGTGGCAGC          | 60                         | 404               |
|              |              | Exon 7-11                 | GGCACCACTAATAATCAGACC          | CAAACCCACACATCTGTAC           | 60                         | 648               |
|              | <i>NAPRT</i> | DNA                       | 5'UTR                          | CTAACTAAGGCAGCCTCTGG          | AGCGGCGGAAGAAGAGCTCGAAC    | 61                |
| Exon 1-3     |              |                           | ACCTCTACCAGGCCACCATG           | GGTAACTGCGCTGAGACCAG          | 61                         | 615               |
| Exon 2-5     |              |                           | CTGGTCTCAGCGCAGTTACC           | GAGAGCAAAGGTAATGCAGC          | 58                         | 1053              |
| Exon 5-6     |              |                           | CCTTTTCAGGCAGCGAGGTGCCC        | CTGTAGGTGTCCAGGAGGC           | 60                         | 439               |
| Exon 6-9     |              |                           | CTACAGCGTGTGGAGGTGAG           | CTGTCCCTACCTTATAGACG          | 58                         | 1049              |
| Exon 9-13    |              |                           | CGTGTTGTTTCCAGTCAGCC           | GCTGGGTGAACAAACGACAC          | 60                         | 893               |
| modified DNA |              | CGI                       | TGGGGGTATTTTTGGTGATTAAG        | CATAATAACCTAATAAAAAATCAATAAAC | 55                         | 356               |
| RT-PCR       |              | Exon 1-13                 | GGACGTCTGGGAGCAGGATG           | CGTGTTGTTTCCAGTCAGCC          | 64                         | 1665              |
|              |              | Exon 9-13                 | GGCATTGGCACCAGTGTGGTCACCTG     | GGCATTGGCACCAGTGTGGTCACCTG    | 60                         | 486               |
| 3' RACE      |              | Exon 9                    | GGCATTGGCACCAGTGTGGTCACCTG     | <i>universal primer</i>       | -                          | -                 |
|              | Exon 10      | GCCACGAATGAAGCTGACCGAGGAC | <i>nested universal primer</i> | -                             | -                          |                   |
| <i>GAPDH</i> | RT-PCR       |                           | CCAGCCGAGCCACATCG              | GGTCATGAGTCCTTCCACG           | 60                         | 520               |
